# Supplementary material for: The newborn delivery room of tomorrow: emerging and future technologies
Source: Springer Nature journal article supplement (doi:10.1038/s41390-022-01988-y), 2022-03-03
Supplement: MOESM1 [file 41390_2022_1988_MOESM1_ESM.pdf]

# Delivery room technology

Showing 60 of 60 responses

Showing **all** responses

Showing **all** questions

Response rate: 60%

## 1 In which continent are you based?

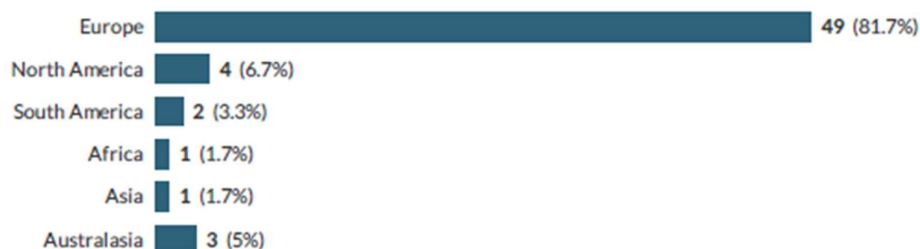

*Multi answer: Percentage of respondents who selected each answer option (e.g. 100% would represent that all this question's respondents chose that option)*

## 2 What is your role in newborn care?

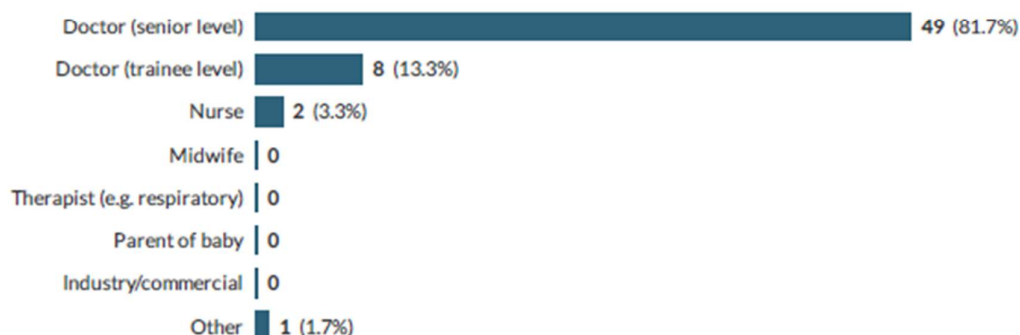

*Multi answer: Percentage of respondents who selected each answer option (e.g. 100% would represent that all this question's respondents chose that option)*

---

**3** Compared to other areas of clinical medicine, technology in the delivery room in the last 5-10 years has:

---

**3.1** Remained unchanged

Describe  **4** (7%)

*Multi answer: Percentage of respondents who selected each answer option (e.g. 100% would represent that all this question's respondents chose that option)*

---

**3.2** Increased a little

Describe  **34** (57%)

*Multi answer: Percentage of respondents who selected each answer option (e.g. 100% would represent that all this question's respondents chose that option)*

---

**3.3** Increased proportionately

Describe  **6** (10%)

*Multi answer: Percentage of respondents who selected each answer option (e.g. 100% would represent that all this question's respondents chose that option)*

---

**3.4** Increased significantly

Describe  **16** (27%)

*Multi answer: Percentage of respondents who selected each answer option (e.g. 100% would represent that all this question's respondents chose that option)*

---

**4** In the last 5-10 years, funding for delivery room technology development and research in my continent has been:

**4.1** Poorly funded

Describe  39 (65%)

*Multi answer: Percentage of respondents who selected each answer option (e.g. 100% would represent that all this question's respondents chose that option)*

**4.2** Adequately funded

Describe  14 (23%)

*Multi answer: Percentage of respondents who selected each answer option (e.g. 100% would represent that all this question's respondents chose that option)*

**4.3** Good funding

Describe  7 (12%)

*Multi answer: Percentage of respondents who selected each answer option (e.g. 100% would represent that all this question's respondents chose that option)*

**4.4** Excellent funding

Describe | 0

*Multi answer: Percentage of respondents who selected each answer option (e.g. 100% would represent that all this question's respondents chose that option)*

## 5 How important are the following measures to you when using technologies in the delivery room?

### 5.1 Heart rate

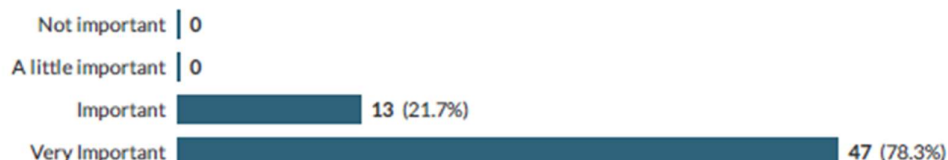

Multi answer: Percentage of respondents who selected each answer option (e.g. 100% would represent that all this question's respondents chose that option)

### 5.2 Temperature

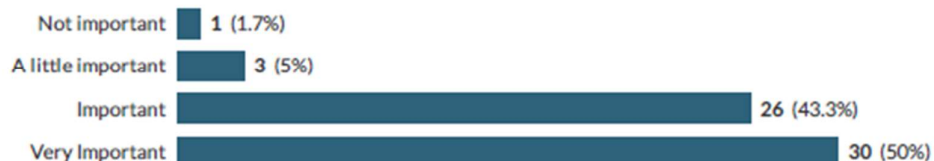

Multi answer: Percentage of respondents who selected each answer option (e.g. 100% would represent that all this question's respondents chose that option)

### 5.3 Oxygen saturations

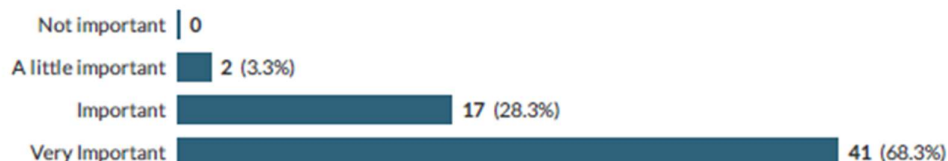

Multi answer: Percentage of respondents who selected each answer option (e.g. 100% would represent that all this question's respondents chose that option)

### 5.4 Cerebral saturations

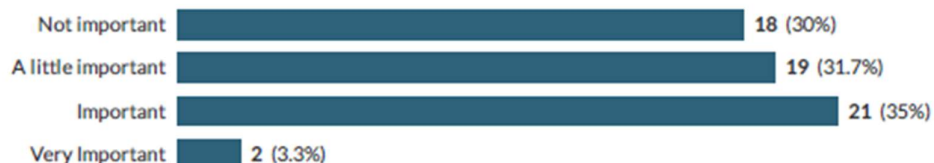

Multi answer: Percentage of respondents who selected each answer option (e.g. 100% would represent that all this question's respondents chose that option)

### 5.5 Exhaled carbon dioxide

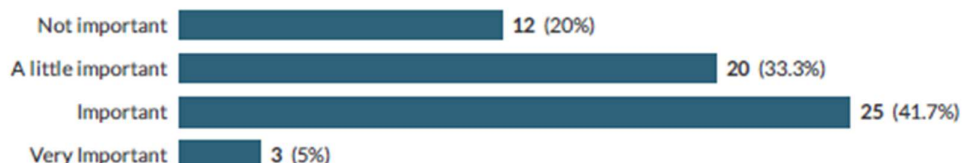

*Multi answer: Percentage of respondents who selected each answer option (e.g. 100% would represent that all this question's respondents chose that option)*

### 5.6 Tidal volumes

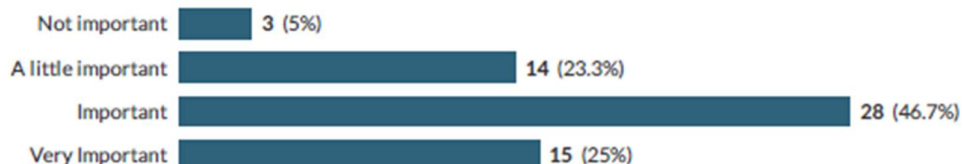

*Multi answer: Percentage of respondents who selected each answer option (e.g. 100% would represent that all this question's respondents chose that option)*

### 5.7 Mask leak

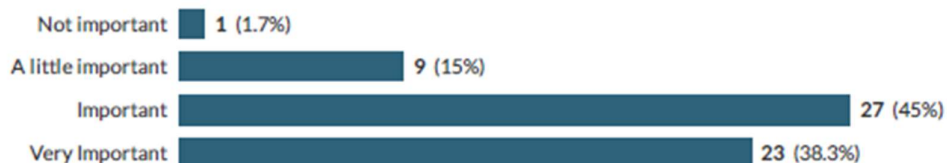

*Multi answer: Percentage of respondents who selected each answer option (e.g. 100% would represent that all this question's respondents chose that option)*

**6** Rate the following delivery room technologies of the future in terms of their importance for the next 5 to 10 years.

**6.1** Near-infrared spectroscopy

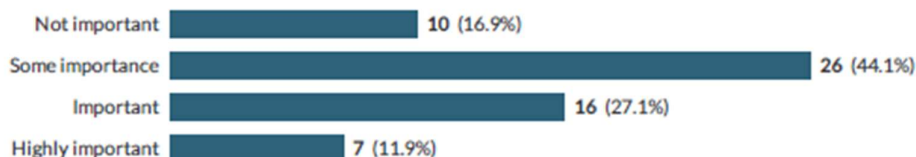

*Multi answer: Percentage of respondents who selected each answer option (e.g. 100% would represent that all this question's respondents chose that option)*

**6.2** Wireless multi-vital signs device

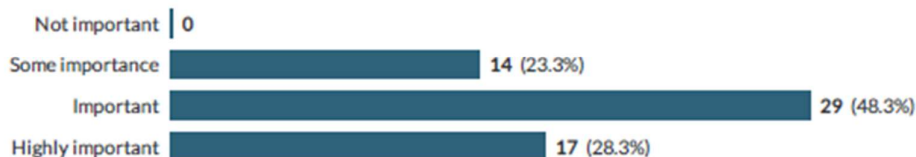

*Multi answer: Percentage of respondents who selected each answer option (e.g. 100% would represent that all this question's respondents chose that option)*

**6.3** Lung aeration/recruitment device

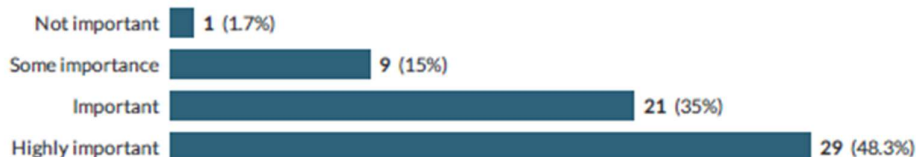

*Multi answer: Percentage of respondents who selected each answer option (e.g. 100% would represent that all this question's respondents chose that option)*

**6.4** Contactless vital signs device

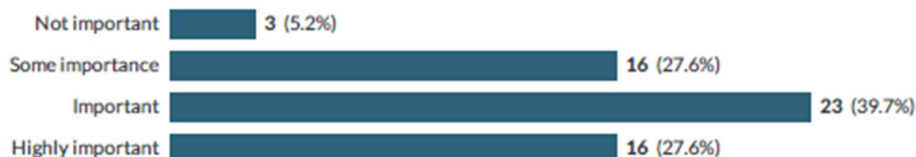

*Multi answer: Percentage of respondents who selected each answer option (e.g. 100% would represent that all this question's respondents chose that option)*

#### 6.5 Artificial intelligence linking delivery room data with outcomes

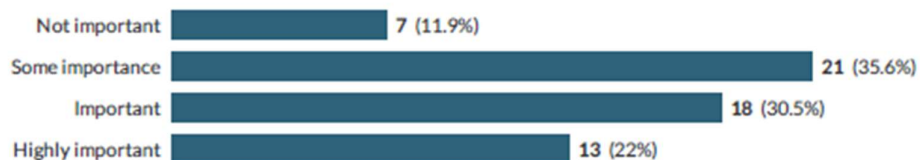

*Multi answer: Percentage of respondents who selected each answer option (e.g. 100% would represent that all this question's respondents chose that option)*

#### 6.6 Autonomous systems such as inspired oxygen

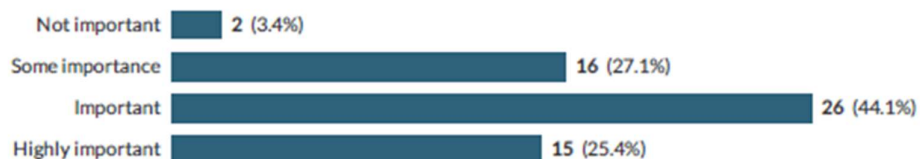

*Multi answer: Percentage of respondents who selected each answer option (e.g. 100% would represent that all this question's respondents chose that option)*

#### 6.7 Video analysis for training/audit

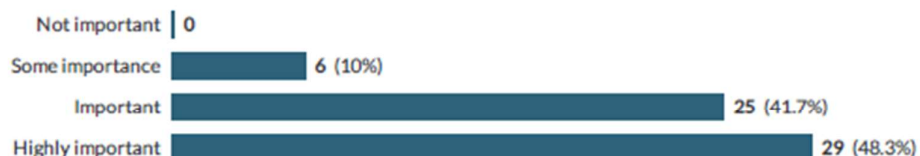

*Multi answer: Percentage of respondents who selected each answer option (e.g. 100% would represent that all this question's respondents chose that option)*

#### 6.8 Ex-uterine support systems (e.g. artificial womb)

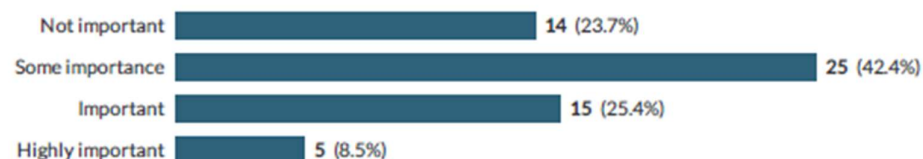

*Multi answer: Percentage of respondents who selected each answer option (e.g. 100% would represent that all this question's respondents chose that option)*

- 7 Are there any other technologies you would like to see in the delivery room (state what it would be)?

| Showing all 14 responses                                                                                                                                        |                        |
|-----------------------------------------------------------------------------------------------------------------------------------------------------------------|------------------------|
| X-ray machinetechnology and Ultrasound technology. Lightsource on the resuscitator cot for fiberoptic bronchoscopy.                                             | 765557-765548-80162507 |
| Video Laryngoscopes that are wireless                                                                                                                           | 765557-765548-80169088 |
| non-radiation imaging technologies / ultrasound /                                                                                                               | 765557-765548-80179298 |
| Telemedicine for delivery room mgmt, ventilation devices (lma?)                                                                                                 | 765557-765548-80179965 |
| <a href="https://jamanetwork.com/journals/jamapediatrics/article-abstract/2780513">https://jamanetwork.com/journals/jamapediatrics/article-abstract/2780513</a> | 765557-765548-80181697 |
| A voice guide or APP to aid in resuscitation.                                                                                                                   | 765557-765548-80195321 |
| Augmented Reality, Decision-support tools, speech recognition, 3D printed devices, stress measurements/biometrics of providers                                  | 765557-765548-80196631 |
| Non-invasive cardiac output measurement                                                                                                                         | 765557-765548-80197188 |
| Integrated cardiac function monitoring                                                                                                                          | 765557-765548-80225314 |
| perfusion                                                                                                                                                       | 765557-765548-80255878 |
| Light assessment to detect pneumothorax, perfusor, Ventilator, incubator/ balance/Apgar                                                                         | 765557-765548-80382399 |
| EIT to monitor lung aeration during transition                                                                                                                  | 765557-765548-80742012 |
| Concord Birth Trolley for physiological cord clamping                                                                                                           | 765557-765548-80745194 |
| A respiratory function monitor can help in the interpretation of first minutes newborn behaviour and modulate interventions                                     | 765557-765548-80947004 |
